# Supplementary material for: Gaseous environment modulates volatile emission and viability loss during seed artificial ageing
Source: PubMed Central journal article supplement (PMC8053187; doi:10.1007/s00425-021-03620-5), 2021-04-17
Supplement: 425_2021_3620_MOESM1_ESM.pdf [file 425_2021_3620_MOESM1_ESM.pdf]

## *Lolium perenne*

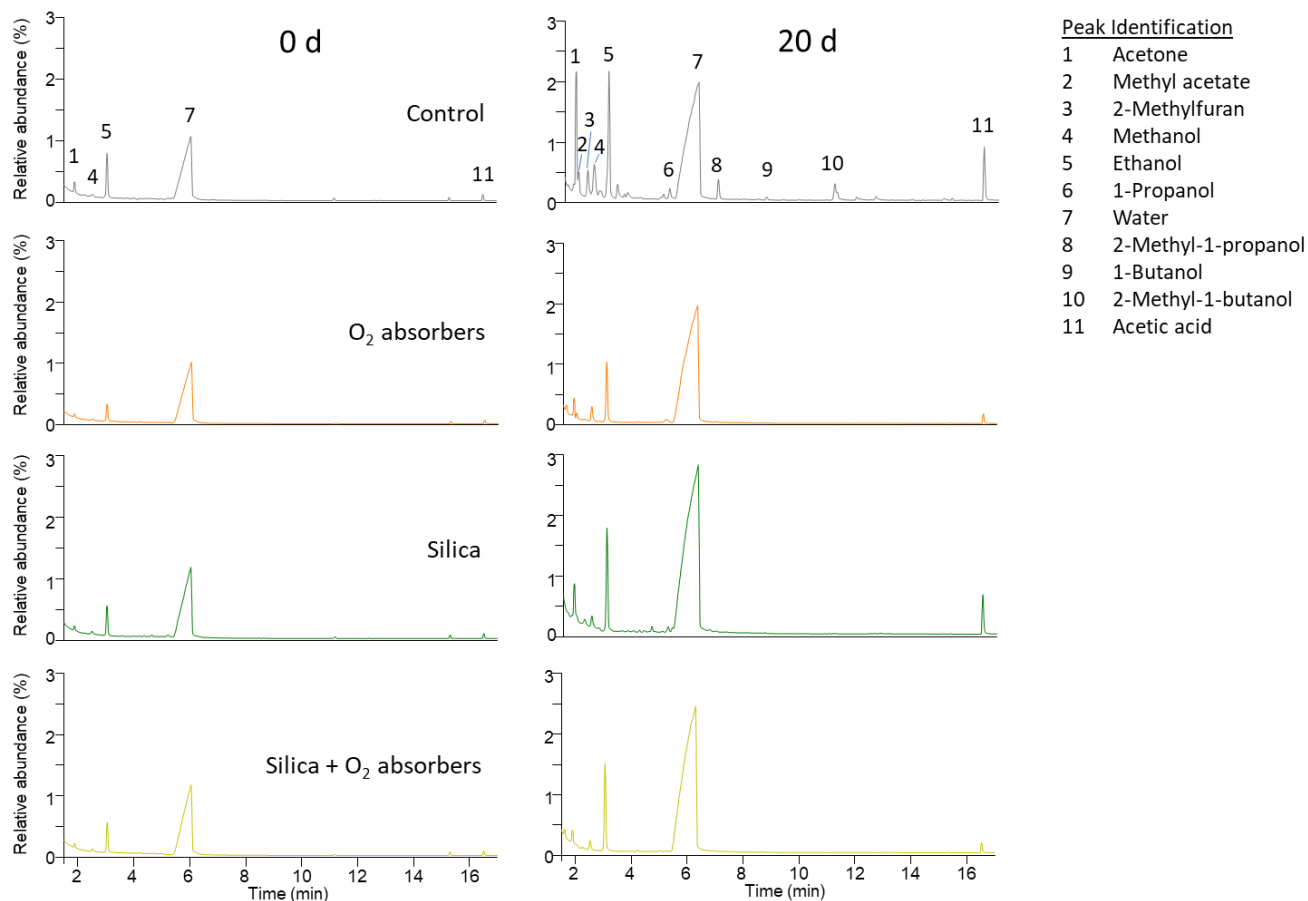

**Suppl. Fig. S1** Example GC chromatograms of the headspace within vials containing *Lolium perenne* seeds at 60% RH after 20 d storage at 20°C (0 d) or 50°C (20 d). The headspace was sampled using solid phase microextraction (SPME). The treatments: control, O<sub>2</sub> absorbers, silica and silica + O<sub>2</sub> absorbers were as described in the main article. Numbered peaks correspond to the compounds in the peak identification list, which were identified by spectral library matching with the NIST database, and confirmed with analytical standards.

**a**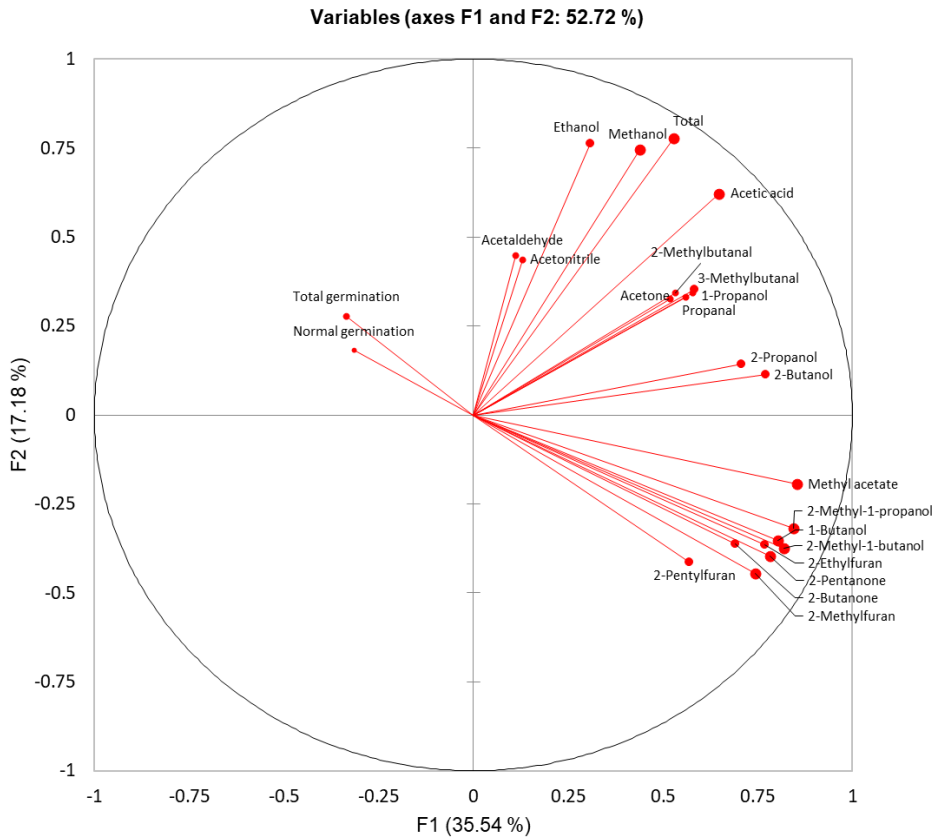**b**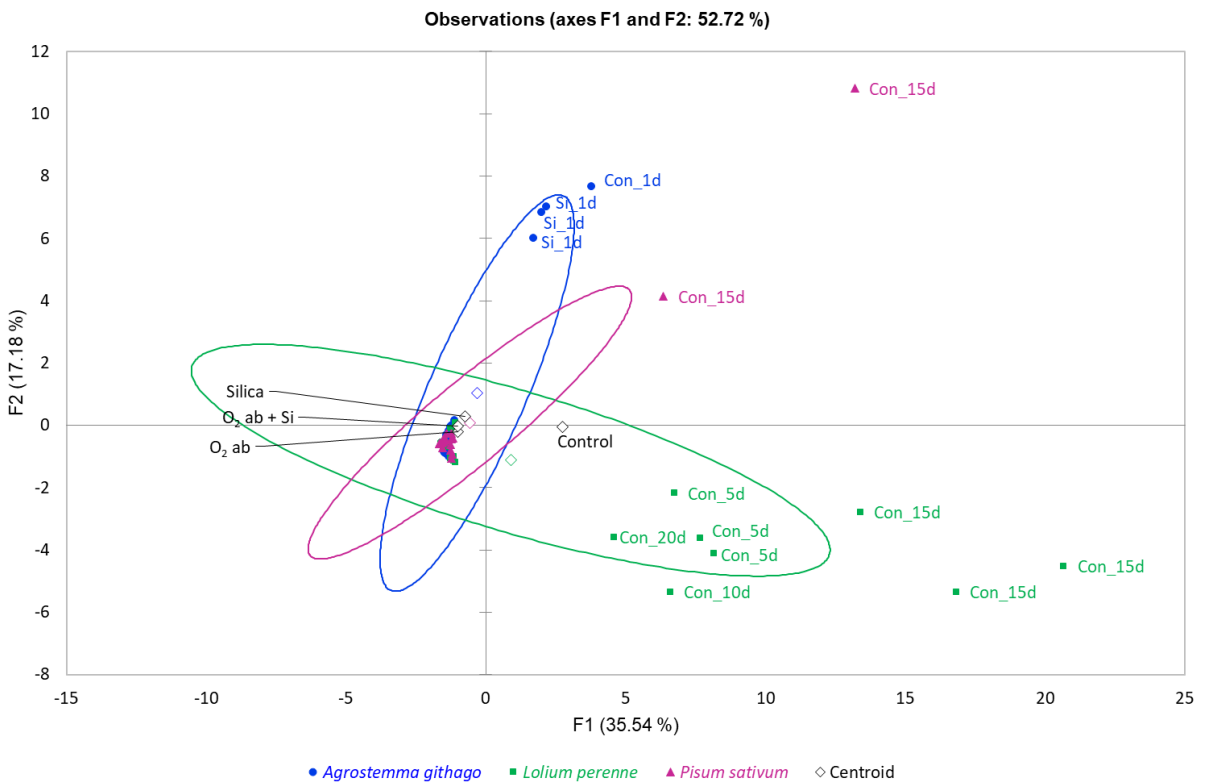

**Suppl. Fig. S2** Plots from PCA of VOC emission and germination for all three species. Correlation circle showing the projection of 24 variables on axes F1 and F2 (a) and plot of observations in the PCA space coloured by species: *Agrostemma githago*, blue; *Lolium perenne*, green; *Pisum sativum*, magenta. The ellipses represent the 95% confidence intervals for each species (b).

**Suppl. Table S1** Pearson correlation matrix of VOC emission and germination for *Agrostemma githago*, *Lolium perenne*, and *Pisum sativum*. Values in bold are different from 0 with a significance level alpha=0.05

| Correlation matrix (Pearson (n)): |                   |                    |              |                  |               |              |                |               |               |              |               |                 |                 |               |              |               |               |              |               |               |                     |               |                    |               |              |              |
|-----------------------------------|-------------------|--------------------|--------------|------------------|---------------|--------------|----------------|---------------|---------------|--------------|---------------|-----------------|-----------------|---------------|--------------|---------------|---------------|--------------|---------------|---------------|---------------------|---------------|--------------------|---------------|--------------|--------------|
| Variables                         | Total germination | Normal germination | Acetaldehyde | Dimethyl sulfide | Propanal      | Acetone      | Methyl acetate | 2-Methylfuran | Ethyl acetate | Methanol     | 2-Butanone    | 2-Methylbutanal | 3-Methylbutanal | 2-Propanol    | Ethanol      | Ethylfuran    | 2-Pentanone   | Acetonitrile | 2-Butanol     | 1-Propanol    | 2-Methyl-1-propanol | 1-Butanol     | 2-Methyl-1-butanol | 2-Pentylfuran | Acetic acid  | Total        |
| Total germination                 | <b>1</b>          | <b>0.893</b>       | 0.024        | <b>-0.355</b>    | -0.065        | -0.037       | <b>-0.412</b>  | <b>-0.338</b> | <b>-0.169</b> | 0.007        | <b>-0.202</b> | -0.127          | -0.126          | <b>-0.200</b> | 0.110        | <b>-0.287</b> | <b>-0.193</b> | 0.011        | <b>-0.176</b> | <b>-0.154</b> | <b>-0.285</b>       | <b>-0.199</b> | <b>-0.274</b>      | <b>-0.258</b> | -0.041       | 0.019        |
| Normal germination                | <b>0.893</b>      | <b>1</b>           | 0.007        | <b>-0.268</b>    | <b>-0.162</b> | -0.035       | <b>-0.373</b>  | <b>-0.256</b> | <b>-0.150</b> | -0.087       | -0.132        | <b>-0.162</b>   | <b>-0.171</b>   | <b>-0.273</b> | 0.108        | <b>-0.230</b> | -0.129        | 0.007        | <b>-0.199</b> | <b>-0.193</b> | <b>-0.228</b>       | <b>-0.147</b> | <b>-0.208</b>      | <b>-0.184</b> | -0.026       | -0.022       |
| Acetaldehyde                      | 0.024             | 0.007              | <b>1</b>     | -0.020           | 0.010         | <b>0.179</b> | -0.031         | -0.031        | -0.028        | <b>0.282</b> | -0.028        | 0.098           | 0.144           | -0.016        | <b>0.482</b> | -0.025        | -0.028        | <b>0.177</b> | 0.001         | <b>0.252</b>  | -0.033              | -0.025        | -0.023             | -0.023        | <b>0.351</b> | <b>0.446</b> |
| Dimethylsulfide                   | <b>-0.355</b>     | <b>-0.268</b>      | -0.020       | <b>1</b>         | -0.025        | -0.046       | 0.069          | 0.095         | -0.018        | -0.031       | 0.055         | -0.033          | -0.025          | 0.027         | -0.013       | 0.144         | 0.056         | 0.053        | -0.051        | -0.021        | 0.034               | -0.002        | 0.036              | <b>0.170</b>  | -0.074       | -0.026       |
| Propanal                          | -0.065            | <b>-0.162</b>      | 0.010        | -0.025           | <b>1</b>      | <b>0.252</b> | <b>0.440</b>   | 0.134         | 0.008         | <b>0.452</b> | 0.107         | <b>0.607</b>    | <b>0.702</b>    | <b>0.780</b>  | 0.093        | <b>0.303</b>  | <b>0.166</b>  | -0.009       | <b>0.820</b>  | <b>0.412</b>  | <b>0.302</b>        | <b>0.195</b>  | <b>0.229</b>       | 0.096         | <b>0.424</b> | <b>0.372</b> |
| Acetone                           | -0.037            | -0.035             | <b>0.179</b> | -0.046           | <b>0.252</b>  | <b>1</b>     | <b>0.408</b>   | <b>0.331</b>  | <b>0.453</b>  | <b>0.461</b> | <b>0.414</b>  | <b>0.212</b>    | <b>0.221</b>    | <b>0.317</b>  | <b>0.475</b> | <b>0.186</b>  | <b>0.302</b>  | 0.123        | <b>0.283</b>  | <b>0.429</b>  | <b>0.296</b>        | <b>0.337</b>  | <b>0.263</b>       | 0.087         | <b>0.566</b> | <b>0.568</b> |
| Methyl acetate                    | <b>-0.412</b>     | <b>-0.373</b>      | -0.031       | 0.069            | <b>0.440</b>  | <b>0.408</b> | <b>1</b>       | <b>0.720</b>  | <b>0.339</b>  | <b>0.202</b> | <b>0.642</b>  | <b>0.393</b>    | <b>0.453</b>    | <b>0.668</b>  | 0.038        | <b>0.600</b>  | <b>0.634</b>  | 0.002        | <b>0.685</b>  | <b>0.469</b>  | <b>0.788</b>        | <b>0.711</b>  | <b>0.751</b>       | <b>0.385</b>  | <b>0.389</b> | <b>0.254</b> |
| 2-Methylfuran                     | <b>-0.338</b>     | <b>-0.256</b>      | -0.031       | 0.095            | 0.134         | <b>0.331</b> | <b>0.720</b>   | <b>1</b>      | <b>0.294</b>  | 0.000        | <b>0.862</b>  | <b>0.169</b>    | <b>0.180</b>    | <b>0.367</b>  | 0.009        | <b>0.698</b>  | <b>0.765</b>  | -0.027       | <b>0.376</b>  | <b>0.245</b>  | <b>0.727</b>        | <b>0.760</b>  | <b>0.740</b>       | <b>0.610</b>  | <b>0.244</b> | 0.107        |
| Ethyl acetate                     | <b>-0.169</b>     | <b>-0.150</b>      | -0.028       | -0.018           | 0.008         | <b>0.453</b> | <b>0.339</b>   | <b>0.294</b>  | <b>1</b>      | 0.050        | <b>0.329</b>  | 0.043           | 0.029           | 0.074         | -0.023       | 0.024         | 0.094         | -0.050       | 0.063         | 0.122         | 0.142               | 0.142         | 0.103              | -0.013        | 0.043        | 0.042        |
| Methanol                          | 0.007             | -0.087             | <b>0.282</b> | -0.031           | <b>0.452</b>  | <b>0.461</b> | <b>0.202</b>   | 0.000         | 0.050         | <b>1</b>     | 0.018         | <b>0.379</b>    | <b>0.403</b>    | <b>0.334</b>  | <b>0.742</b> | 0.105         | 0.074         | <b>0.362</b> | <b>0.394</b>  | <b>0.423</b>  | <b>0.155</b>        | 0.090         | 0.090              | 0.003         | <b>0.744</b> | <b>0.909</b> |
| 2-Butanone                        | <b>-0.202</b>     | -0.132             | -0.028       | 0.055            | 0.107         | <b>0.414</b> | <b>0.642</b>   | <b>0.862</b>  | <b>0.329</b>  | 0.018        | <b>1</b>      | <b>0.158</b>    | <b>0.157</b>    | <b>0.320</b>  | 0.047        | <b>0.525</b>  | <b>0.783</b>  | -0.035       | <b>0.314</b>  | <b>0.311</b>  | <b>0.656</b>        | <b>0.790</b>  | <b>0.641</b>       | <b>0.405</b>  | <b>0.280</b> | 0.135        |
| 2-Methylbutanal                   | -0.127            | <b>-0.162</b>      | 0.098        | -0.033           | <b>0.607</b>  | <b>0.212</b> | <b>0.393</b>   | <b>0.169</b>  | 0.043         | <b>0.379</b> | <b>0.158</b>  | <b>1</b>        | <b>0.966</b>    | <b>0.686</b>  | <b>0.225</b> | <b>0.295</b>  | <b>0.186</b>  | -0.083       | <b>0.515</b>  | <b>0.317</b>  | <b>0.255</b>        | <b>0.147</b>  | <b>0.151</b>       | <b>0.164</b>  | <b>0.403</b> | <b>0.401</b> |
| 3-Methylbutanal                   | -0.126            | <b>-0.171</b>      | 0.144        | -0.025           | <b>0.702</b>  | <b>0.221</b> | <b>0.453</b>   | <b>0.180</b>  | 0.029         | <b>0.403</b> | <b>0.157</b>  | <b>0.966</b>    | <b>1</b>        | <b>0.764</b>  | <b>0.217</b> | <b>0.331</b>  | <b>0.208</b>  | -0.073       | <b>0.613</b>  | <b>0.337</b>  | <b>0.301</b>        | <b>0.187</b>  | <b>0.210</b>       | <b>0.174</b>  | <b>0.436</b> | <b>0.421</b> |
| 2-Propanol                        | <b>-0.200</b>     | <b>-0.273</b>      | -0.016       | 0.027            | <b>0.780</b>  | <b>0.317</b> | <b>0.668</b>   | <b>0.367</b>  | 0.074         | <b>0.334</b> | <b>0.320</b>  | <b>0.686</b>    | <b>0.764</b>    | <b>1</b>      | 0.042        | <b>0.472</b>  | <b>0.326</b>  | -0.033       | <b>0.751</b>  | <b>0.509</b>  | <b>0.452</b>        | <b>0.362</b>  | <b>0.390</b>       | <b>0.271</b>  | <b>0.346</b> | <b>0.320</b> |
| Ethanol                           | 0.110             | 0.108              | <b>0.482</b> | -0.013           | 0.093         | <b>0.475</b> | <b>0.634</b>   | 0.009         | -0.023        | <b>0.742</b> | 0.047         | <b>0.225</b>    | <b>0.217</b>    | 0.042         | <b>1</b>     | 0.019         | 0.061         | <b>0.552</b> | <b>0.103</b>  | <b>0.341</b>  | 0.058               | 0.084         | 0.060              | -0.017        | <b>0.822</b> | <b>0.926</b> |
| 2-Ethylfuran                      | <b>-0.287</b>     | <b>-0.230</b>      | -0.025       | 0.144            | <b>0.303</b>  | <b>0.186</b> | <b>0.600</b>   | <b>0.698</b>  | 0.024         | 0.105        | <b>0.525</b>  | <b>0.295</b>    | <b>0.331</b>    | <b>0.472</b>  | 0.019        | <b>1</b>      | <b>0.795</b>  | -0.005       | <b>0.506</b>  | <b>0.251</b>  | <b>0.760</b>        | <b>0.666</b>  | <b>0.783</b>       | <b>0.926</b>  | <b>0.270</b> | <b>0.162</b> |
| 2-Pentanone                       | <b>-0.193</b>     | -0.129             | -0.028       | 0.056            | <b>0.166</b>  | <b>0.302</b> | <b>0.634</b>   | <b>0.765</b>  | 0.094         | 0.074        | <b>0.783</b>  | <b>0.186</b>    | <b>0.208</b>    | <b>0.326</b>  | 0.061        | <b>0.795</b>  | <b>1</b>      | 0.014        | <b>0.438</b>  | <b>0.306</b>  | <b>0.795</b>        | <b>0.902</b>  | <b>0.836</b>       | <b>0.706</b>  | <b>0.339</b> | <b>0.172</b> |
| Acetonitrile                      | 0.011             | 0.007              | <b>0.177</b> | 0.053            | -0.009        | 0.123        | 0.002          | -0.027        | -0.050        | <b>0.362</b> | -0.035        | -0.083          | -0.073          | -0.033        | <b>0.552</b> | -0.005        | 0.014         | <b>1</b>     | 0.014         | <b>0.351</b>  | 0.011               | 0.034         | 0.046              | -0.011        | <b>0.443</b> | <b>0.479</b> |
| 2-Butanol                         | <b>-0.176</b>     | <b>-0.199</b>      | 0.001        | -0.051           | <b>0.820</b>  | <b>0.283</b> | <b>0.685</b>   | <b>0.376</b>  | 0.063         | <b>0.394</b> | <b>0.314</b>  | <b>0.515</b>    | <b>0.613</b>    | <b>0.751</b>  | 0.103        | <b>0.506</b>  | <b>0.438</b>  | 0.014        | <b>1</b>      | <b>0.461</b>  | <b>0.639</b>        | <b>0.552</b>  | <b>0.635</b>       | <b>0.270</b>  | <b>0.493</b> | <b>0.373</b> |
| 1-Propanol                        | <b>-0.154</b>     | <b>-0.193</b>      | <b>0.252</b> | -0.021           | <b>0.412</b>  | <b>0.429</b> | <b>0.469</b>   | <b>0.245</b>  | 0.122         | <b>0.423</b> | <b>0.311</b>  | <b>0.317</b>    | <b>0.337</b>    | <b>0.509</b>  | <b>0.341</b> | <b>0.251</b>  | <b>0.306</b>  | <b>0.351</b> | <b>0.461</b>  | <b>1</b>      | <b>0.334</b>        | <b>0.358</b>  | <b>0.314</b>       | 0.103         | <b>0.535</b> | <b>0.500</b> |
| 2-Methyl-1-propanol               | <b>-0.285</b>     | <b>-0.228</b>      | -0.033       | 0.034            | <b>0.302</b>  | <b>0.296</b> | <b>0.788</b>   | <b>0.727</b>  | 0.142         | <b>0.155</b> | <b>0.656</b>  | <b>0.255</b>    | <b>0.301</b>    | <b>0.452</b>  | 0.058        | <b>0.760</b>  | <b>0.795</b>  | 0.011        | <b>0.639</b>  | <b>0.334</b>  | <b>1</b>            | <b>0.855</b>  | <b>0.923</b>       | <b>0.567</b>  | <b>0.412</b> | <b>0.228</b> |
| 1-Butanol                         | <b>-0.199</b>     | <b>-0.147</b>      | -0.025       | -0.002           | <b>0.195</b>  | <b>0.337</b> | <b>0.711</b>   | <b>0.760</b>  | 0.142         | 0.090        | <b>0.790</b>  | <b>0.147</b>    | <b>0.187</b>    | <b>0.362</b>  | 0.084        | <b>0.666</b>  | <b>0.902</b>  | 0.034        | <b>0.552</b>  | <b>0.358</b>  | <b>0.855</b>        | <b>1</b>      | <b>0.930</b>       | <b>0.479</b>  | <b>0.384</b> | <b>0.202</b> |
| 2-Methyl-1-butanol                | <b>-0.274</b>     | <b>-0.208</b>      | -0.023       | 0.036            | <b>0.229</b>  | <b>0.263</b> | <b>0.751</b>   | <b>0.740</b>  | 0.103         | 0.090        | <b>0.641</b>  | <b>0.151</b>    | <b>0.210</b>    | <b>0.390</b>  | 0.060        | <b>0.783</b>  | <b>0.836</b>  | 0.046        | <b>0.635</b>  | <b>0.314</b>  | <b>0.923</b>        | <b>0.930</b>  | <b>1</b>           | <b>0.605</b>  | <b>0.369</b> | <b>0.190</b> |
| 2-Pentylfuran                     | <b>-0.258</b>     | <b>-0.184</b>      | -0.023       | <b>0.170</b>     | 0.096         | 0.087        | <b>0.385</b>   | <b>0.610</b>  | -0.013        | 0.003        | <b>0.405</b>  | <b>0.164</b>    | <b>0.174</b>    | <b>0.271</b>  | -0.017       | <b>0.926</b>  | <b>0.706</b>  | -0.011       | <b>0.270</b>  | 0.103         | <b>0.567</b>        | <b>0.479</b>  | <b>0.605</b>       | <b>1</b>      | 0.130        | 0.057        |
| Acetic acid                       | -0.041            | -0.026             | <b>0.351</b> | -0.074           | <b>0.424</b>  | <b>0.566</b> | <b>0.389</b>   | <b>0.244</b>  | 0.043         | <b>0.744</b> | <b>0.280</b>  | <b>0.403</b>    | <b>0.436</b>    | <b>0.346</b>  | <b>0.822</b> | <b>0.270</b>  | <b>0.339</b>  | <b>0.443</b> | <b>0.493</b>  | <b>0.535</b>  | <b>0.412</b>        | <b>0.384</b>  | <b>0.369</b>       | 0.130         | <b>1</b>     | <b>0.904</b> |
| Total                             | 0.019             | -0.022             | <b>0.446</b> | -0.026           | <b>0.372</b>  | <b>0.568</b> | <b>0.254</b>   | 0.107         | 0.042         | <b>0.909</b> | 0.135         | <b>0.401</b>    | <b>0.421</b>    | <b>0.320</b>  | <b>0.926</b> | <b>0.162</b>  | <b>0.172</b>  | <b>0.479</b> | <b>0.373</b>  | <b>0.500</b>  | <b>0.228</b>        | <b>0.202</b>  | <b>0.190</b>       | 0.057         | <b>0.904</b> | <b>1</b>     |

Values in bold are different from 0 with a significance level alpha=0.05

**Suppl. Table S2** Eigenvalues and corresponding factors of Principal Component Analysis of VOC emission and germination for *Agrostemma githago*, *Lolium perenne*, and *Pisum sativum*.

|                 | F1     | F2     | F3     | F4     | F5     | F6     | F7     | F8     | F9     | F10    | F11    | F12    | F13    | F14    | F15    | F16    | F17    | F18    | F19    | F20    | F21    | F22    | F23    | F24    | F25     |
|-----------------|--------|--------|--------|--------|--------|--------|--------|--------|--------|--------|--------|--------|--------|--------|--------|--------|--------|--------|--------|--------|--------|--------|--------|--------|---------|
| Eigenvalue      | 9.241  | 4.468  | 2.662  | 1.913  | 1.548  | 1.047  | 0.855  | 0.741  | 0.673  | 0.623  | 0.501  | 0.357  | 0.307  | 0.262  | 0.201  | 0.124  | 0.118  | 0.102  | 0.080  | 0.056  | 0.048  | 0.036  | 0.018  | 0.013  | 0.006   |
| Variability (%) | 35.542 | 17.183 | 10.238 | 7.358  | 5.956  | 4.029  | 3.289  | 2.850  | 2.587  | 2.395  | 1.928  | 1.374  | 1.181  | 1.008  | 0.774  | 0.477  | 0.453  | 0.392  | 0.308  | 0.214  | 0.185  | 0.138  | 0.069  | 0.049  | 0.023   |
| Cumulative %    | 35.542 | 52.725 | 62.963 | 70.321 | 76.277 | 80.306 | 83.595 | 86.445 | 89.032 | 91.427 | 93.355 | 94.729 | 95.910 | 96.918 | 97.692 | 98.169 | 98.622 | 99.014 | 99.322 | 99.535 | 99.721 | 99.859 | 99.928 | 99.977 | 100.000 |
